# Supplementary material for: A tissue-based approach to selection of reference genes for quantitative real-time PCR in a sheep osteoporosis model
Source: PubMed Central journal article supplement (PMC5735898; doi:10.1186/s12864-017-4356-4), 2017-12-19

### BioGPS Analysis

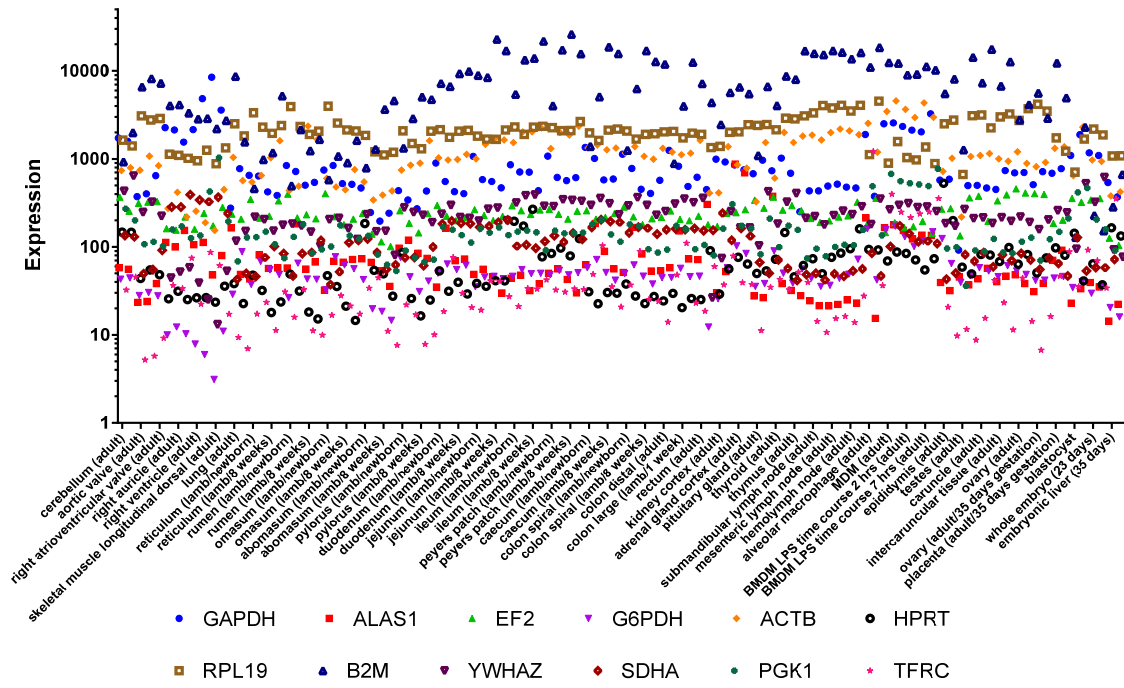

Supplement: 12864_2017_4356_MOESM2_ESM.pdf [file 12864_2017_4356_MOESM2_ESM.pdf]
